# Supplementary material for: A phase II study of laquinimod in Crohn's disease
Source: PubMed Central journal article supplement — Gut. 2014 Oct 3;64(8):1227–35. doi: 10.1136/gutjnl-2014-307118 (PMC4515993; doi:10.1136/gutjnl-2014-307118), 2014-10-03
Supplement: gutjnl-2014-307118-s1.pdf [file gutjnl-2014-307118-s1.pdf]

Supplement Table 1. Serious Adverse Events

| Body System and Adverse Event <sup>a</sup>          | Total Number (%) of Subjects with Serious Adverse Event |                   |                   |                   |                   |
|-----------------------------------------------------|---------------------------------------------------------|-------------------|-------------------|-------------------|-------------------|
|                                                     | Pooled Placebo (N=63)                                   | Laq 0.5 mg (N=29) | Laq 1.0 mg (N=30) | Laq 1.5 mg (N=29) | Laq 2.0 mg (N=29) |
| All                                                 | 7 (11.1)                                                | 3 (10.3)          | 8 (26.7)          | 1 (3.4)           | 3 (10.3)          |
| Endocrine disorders                                 | 0                                                       | 0                 | 1 (3.3)           | 0                 | 0                 |
| Goitre                                              | 0                                                       | 0                 | 1 (3.3)           | 0                 | 0                 |
| Gastrointestinal disorders                          | 2 (3.2)                                                 | 3 (10.3)          | 5 (16.7)          | 1 (3.4)           | 1 (3.4)           |
| Abdominal pain                                      | 0                                                       | 0                 | 1 (3.3)           | 0                 | 0                 |
| Abdominal pain lower                                | 0                                                       | 0                 | 1 (3.3)           | 0                 | 0                 |
| Crohn's disease <sup>b</sup>                        | 1 (1.6)                                                 | 2 (6.9)           | 3 (10.0)          | 1 (3.4)           | 1 (3.4)           |
| Inguinal hernia                                     | 0                                                       | 1 (3.4)           | 0                 | 0                 | 0                 |
| Gastrointestinal hemorrhage                         | 1 (1.6)                                                 | 0                 | 0                 | 0                 | 0                 |
| General disorder and administration site conditions | 0                                                       | 0                 | 0                 | 0                 | 1 (3.4)           |
| Non-cardiac disorder                                | 0                                                       | 0                 | 0                 | 0                 | 1 (3.4)           |
| Infections and Infestations                         | 1 (1.6)                                                 | 0                 | 2 (6.7)           | 0                 | 0                 |
| Abdominal abscess                                   | 1 (1.6)                                                 | 0                 | 1 (3.3)           | 0                 | 0                 |
| Gastroenteritis viral                               | 0                                                       | 0                 | 1 (3.3)           | 0                 | 0                 |
| Investigations                                      | 0                                                       | 0                 | 0                 | 1 (3.4)           | 0                 |
| Blood amylase increased                             | 0                                                       | 0                 | 0                 | 1 (3.4)           | 0                 |
| Metabolism and nutrition disorders                  | 1 (1.6)                                                 | 0                 | 0                 | 0                 | 0                 |
| Hypoalbuminaemia                                    | 1 (1.6)                                                 | 0                 | 0                 | 0                 | 0                 |
| Nervous system disorders                            | 1 (1.6)                                                 | 0                 | 0                 | 1 (3.4)           | 0                 |
| Headache                                            | 0                                                       | 0                 | 0                 | 1 (3.4)           | 0                 |
| Presyncope                                          | 1 (1.6)                                                 | 0                 | 0                 | 0                 | 0                 |
| Reproductive system and breast disorders            | 0                                                       | 0                 | 0                 | 0                 | 1 (3.4)           |
| Dysmenorrhoea                                       | 0                                                       | 0                 | 0                 | 0                 | 1 (3.4)           |
| Surgical and medical procedures                     | 1 (1.6)                                                 | 0                 | 2 (6.7)           | 0                 | 0                 |
| Intestinal resection                                | 1 (1.6)                                                 | 0                 | 1 (3.3)           | 0                 | 0                 |
| Proctocolectomy                                     | 0                                                       | 0                 | 1 (3.3)           | 0                 | 0                 |
| Ileostomy                                           | 1 (1.6)                                                 | 0                 | 1 (3.3)           | 0                 | 0                 |
| Vascular disorders                                  | 1 (1.6)                                                 | 0                 | 0                 | 0                 | 0                 |
| Deep vein thrombosis                                | 1 (1.6)                                                 | 0                 | 0                 | 0                 | 0                 |
